# Supplementary material for: Comprehensive analysis of disulfidptosis-related genes: a prognosis model construction and tumor microenvironment characterization in clear cell renal cell carcinoma
Source: Aging (Albany NY). 2024 Feb 14;16(4):3647–73. doi: 10.18632/aging.205550 (PMC10929811; doi:10.18632/aging.205550)
Supplement: Supplementary Table 1 [file aging-16-205550-s002.xlsx]

## Sheet: Sheet1
Supplementary Table 1. Drug susceptibility in patients of low and high-score groups.
Drugs	Low-score group	High-score group
A.443654	-	＋
A.770041	-	＋
ABT.263	+	-
AKT.inhibitor.VIII	+	-
AMG.706	-	＋
AS601245	+	-
AUY922	+	-
AZD.0530	-	＋
AZD6244	-	＋
AZD6482	+	-
AZD7762	-	＋
AZD8055	+	-
BAY.61.3606	+	-
Bexarotene	+	-
BI.2536	-	＋
BI.D1870	-	＋
BIRB.0796	+	-
Bleomycin	+	-
BMS.509744	-	＋
BMS.536924	-	＋
BMS.708163	-	＋
BMS.754807	+	-
Bryostatin.1	-	＋
BX.795	-	＋
Camptothecin	-	＋
CCT018159	-	＋
CEP.701	-	＋
CGP.082996	-	＋
CGP.60474	-	＋
CHIR.99021	+	-
CI.1040	-	＋
CMK	-	＋
Dasatinib	-	＋						－
DMOG	-	＋
Docetaxel	-	＋
Doxorubicin	+	-
EHT.1864	+	-
Elesclomol	-	＋
Embelin	+	-
Epothilone.B	+	-
Etoposide	+	-
FH535	+	-
FTI.277	+	-
Gefitinib	-	＋
Gemcitabine	+	-
GNF.2	-	＋
GSK.650394	+	-
GSK269962A	-	＋
GW.441756	+	-
GW843682X	-	＋
Imatinib	+	-
IPA.3	+	-
JNJ.26854165	-	＋
JNK.9L	+	-
JNK.Inhibitor.VIII	-	＋
KIN001.135	-	＋
KU.55933	-	＋
LFM.A13	-	＋
MG.132	+	-
Midostaurin	+	-
MS.275	-	＋
NU.7441	-	＋
Nutlin.3a	-	＋
NVP.BEZ235	-	＋
NVP.TAE684	-	＋
Obatoclax.Mesylate	+	-
OSI.906	+	-
PAC.1	+	-
Paclitaxel	-	＋
Parthenolide	-	＋
Pazopanib	+	-
PD.0325901	-	＋
PD.0332991	-	＋
PF.02341066	+	-
PF.562271	-	＋
QS11	+	-
Rapamycin	-	＋
RDEA119	-	＋
RO.3306	-	＋
Roscovitine	-	＋
SB590885	+	-
Shikonin	+	-
SL.0101.1	-	＋
Sorafenib	+	-
Sunitinib	-	＋
Temsirolimus	-	＋
Thapsigargin	+	-
Tipifarnib	+	-
TW.37	+	-
Vinblastine	-	＋
Vinorelbine	+	-
Vorinostat	+	-
VX.680	-	＋
WH.4.023	-	＋
WO2009093972	-	＋
WZ.1.84	-	＋
X17.AAG	-	＋
ZM.447439	-	＋
"+":indicated up-regulated sensitivity; "-":indicated down-regulated sensitivity
