# Supplementary material for: Comprehensive analysis of disulfidptosis-related genes: a prognosis model construction and tumor microenvironment characterization in clear cell renal cell carcinoma
Source: Aging (Albany NY). 2024 Feb 14;16(4):3647–73. doi: 10.18632/aging.205550 (PMC10929811; doi:10.18632/aging.205550)
Supplement: Supplementary Table 2 [file aging-16-205550-s003.xlsx]

## Sheet: Sheet1
Supplementary Table 2. Detailed clinical information of ccRCC.
Id	Age	Gender	T	N	M
TCGA-CZ-4859	59	FEMALE	T1	N0	M0
TCGA-B4-5835	64	FEMALE	T1	N0	M0
TCGA-B0-5705	65	FEMALE	T1	N0	M0
TCGA-A3-3331	86	FEMALE	T1	N0	M0
TCGA-B0-5104	90	FEMALE	T1	N0	M0
TCGA-B4-5843	45	MALE	T1	N0	M0
TCGA-B0-5699	53	MALE	T1	N0	M0
TCGA-A3-3380	54	MALE	T1	N0	M0
TCGA-B4-5834	59	MALE	T1	N0	M0
TCGA-A3-3378	60	MALE	T1	N0	M0
TCGA-CZ-5986	61	MALE	T1	N0	M0
TCGA-BP-4353	61	MALE	T1	N0	M0
TCGA-B4-5378	62	MALE	T1	N0	M0
TCGA-AK-3425	68	MALE	T1	N0	M0
TCGA-B0-5707	39	FEMALE	T1	N0	M0
TCGA-A3-3385	46	FEMALE	T1	N0	M0
TCGA-B0-4824	49	FEMALE	T1	N0	M0
TCGA-BP-5186	50	FEMALE	T1	N0	M0
TCGA-BP-4964	54	FEMALE	T1	N0	M0
TCGA-A3-3358	57	FEMALE	T1	N0	M0
TCGA-A3-3362	60	FEMALE	T1	N0	M0
TCGA-B8-5159	61	FEMALE	T1	N0	M0
TCGA-B8-4148	63	FEMALE	T1	N0	M0
TCGA-B0-5691	66	FEMALE	T1	N0	M0
TCGA-B0-5110	71	FEMALE	T1	N0	M0
TCGA-BP-4768	72	FEMALE	T1	N0	M0
TCGA-B0-5120	72	FEMALE	T1	N0	M0
TCGA-B8-4154	73	FEMALE	T1	N0	M0
TCGA-BP-4795	74	FEMALE	T1	N0	M0
TCGA-B0-4945	75	FEMALE	T1	N0	M0
TCGA-A3-3359	82	FEMALE	T1	N0	M0
TCGA-AK-3450	85	FEMALE	T1	N0	M0
TCGA-B8-5545	42	MALE	T1	N0	M0
TCGA-B8-5165	43	MALE	T1	N0	M0
TCGA-B0-4834	49	MALE	T1	N0	M0
TCGA-A3-3387	49	MALE	T1	N0	M0
TCGA-B0-5697	50	MALE	T1	N0	M0
TCGA-A3-3376	51	MALE	T1	N0	M0
TCGA-BP-4331	52	MALE	T1	N0	M0
TCGA-BP-5182	56	MALE	T1	N0	M0
TCGA-B8-4619	58	MALE	T1	N0	M0
TCGA-BP-5006	61	MALE	T1	N0	M0
TCGA-B0-5083	63	MALE	T1	N0	M0
TCGA-B0-5106	64	MALE	T1	N0	M0
TCGA-AK-3427	65	MALE	T1	N0	M0
TCGA-CJ-6030	65	MALE	T1	N0	M0
TCGA-3Z-A93Z	69	MALE	T1	N0	M0
TCGA-BP-4988	72	MALE	T1	N0	M0
TCGA-BP-4986	75	MALE	T1	N0	M0
TCGA-B0-5077	77	MALE	T1	N0	M0
TCGA-B0-5700	77	MALE	T1	N0	M0
TCGA-B2-5641	79	MALE	T1	N0	M0
TCGA-B0-4823	88	MALE	T1	N0	M0
TCGA-A3-3349	34	FEMALE	T1	N0	M0
TCGA-B8-5546	38	FEMALE	T1	N0	M0
TCGA-A3-3370	48	FEMALE	T1	N0	M0
TCGA-A3-3374	51	FEMALE	T1	N0	M0
TCGA-BP-4326	53	FEMALE	T1	N0	M0
TCGA-A3-3373	54	FEMALE	T1	N0	M0
TCGA-B0-5695	61	FEMALE	T1	N0	M0
TCGA-B4-5836	61	FEMALE	T1	N0	M0
TCGA-B0-5119	61	FEMALE	T1	N0	M0
TCGA-BP-4756	62	FEMALE	T1	N0	M0
TCGA-CZ-4856	62	FEMALE	T1	N0	M0
TCGA-BP-4165	64	FEMALE	T1	N0	M0
TCGA-BP-4325	64	FEMALE	T1	N0	M0
TCGA-BP-4162	65	FEMALE	T1	N0	M0
TCGA-CJ-4892	65	FEMALE	T1	N0	M0
TCGA-B8-5551	65	FEMALE	T1	N0	M0
TCGA-B8-5553	67	FEMALE	T1	N0	M0
TCGA-B0-4838	69	FEMALE	T1	N0	M0
TCGA-BP-4340	70	FEMALE	T1	N0	M0
TCGA-BP-4170	72	FEMALE	T1	N0	M0
TCGA-CJ-4874	73	FEMALE	T1	N0	M0
TCGA-B0-4839	80	FEMALE	T1	N0	M0
TCGA-B0-4833	82	FEMALE	T1	N0	M0
TCGA-CZ-5988	38	MALE	T1	N0	M0
TCGA-BP-4968	40	MALE	T1	N0	M0
TCGA-BP-4338	43	MALE	T1	N0	M0
TCGA-B0-5399	46	MALE	T1	N0	M0
TCGA-CJ-4872	51	MALE	T1	N0	M0
TCGA-CZ-5984	51	MALE	T1	N0	M0
TCGA-B0-5088	53	MALE	T1	N0	M0
TCGA-B8-5549	53	MALE	T1	N0	M0
TCGA-B2-5633	56	MALE	T1	N0	M0
TCGA-B0-5121	56	MALE	T1	N0	M0
TCGA-B0-5710	57	MALE	T1	N0	M0
TCGA-A3-3313	59	MALE	T1	N0	M0
TCGA-CW-6088	60	MALE	T1	N0	M0
TCGA-B0-4837	63	MALE	T1	N0	M0
TCGA-B8-4621	63	MALE	T1	N0	M0
TCGA-A3-3306	67	MALE	T1	N0	M0
TCGA-BP-4995	68	MALE	T1	N0	M0
TCGA-CZ-4854	68	MALE	T1	N0	M0
TCGA-BP-4158	69	MALE	T1	N0	M0
TCGA-BP-4159	70	MALE	T1	N0	M0
TCGA-BP-5169	70	MALE	T1	N0	M0
TCGA-B0-5702	71	MALE	T1	N0	M0
TCGA-A3-3367	72	MALE	T1	N0	M0
TCGA-B0-5703	73	MALE	T1	N0	M0
TCGA-A3-3329	75	MALE	T1	N0	M0
TCGA-B0-5698	77	MALE	T1	N0	M0
TCGA-A3-3328	79	MALE	T1	N0	M0
TCGA-AK-3433	48	FEMALE	T2	N0	M0
TCGA-CJ-4639	49	FEMALE	T2	N0	M0
TCGA-AK-3429	54	FEMALE	T2	N0	M0
TCGA-B4-5844	61	FEMALE	T2	N0	M0
TCGA-CZ-5470	72	FEMALE	T2	N0	M0
TCGA-BP-4327	75	FEMALE	T2	N0	M0
TCGA-BP-4169	76	FEMALE	T2	N0	M0
TCGA-B0-4852	78	FEMALE	T2	N0	M0
TCGA-CZ-5469	41	MALE	T2	N0	M0
TCGA-AK-3443	45	MALE	T2	N0	M0
TCGA-B0-5706	45	MALE	T2	N0	M0
TCGA-BP-5007	45	MALE	T2	N0	M0
TCGA-BP-4960	46	MALE	T2	N0	M0
TCGA-BP-4173	47	MALE	T2	N0	M0
TCGA-AK-3456	48	MALE	T2	N0	M0
TCGA-AK-3451	48	MALE	T2	N0	M0
TCGA-B0-4816	49	MALE	T2	N0	M0
TCGA-BP-4174	49	MALE	T2	N0	M0
TCGA-A3-3363	50	MALE	T2	N0	M0
TCGA-CZ-5456	57	MALE	T2	N0	M0
TCGA-BP-5199	58	MALE	T2	N0	M0
TCGA-CZ-5985	58	MALE	T2	N0	M0
TCGA-CZ-5989	60	MALE	T2	N0	M0
TCGA-A3-3357	62	MALE	T2	N0	M0
TCGA-A3-3317	67	MALE	T2	N0	M0
TCGA-CZ-5452	69	MALE	T2	N0	M0
TCGA-CZ-5451	74	MALE	T2	N0	M0
TCGA-BP-4342	79	MALE	T2	N0	M0
TCGA-A3-3343	79	MALE	T2	N0	M0
TCGA-CZ-4864	86	MALE	T2	N0	M0
TCGA-A3-3335	41	MALE	T2	N0	M0
TCGA-A3-3351	42	MALE	T2	N0	M0
TCGA-CJ-4643	67	FEMALE	T2	N0	M0
TCGA-CJ-4876	57	MALE	T2	N0	M0
TCGA-B8-4151	51	FEMALE	T3	N0	M0
TCGA-BP-4351	51	FEMALE	T3	N0	M0
TCGA-BP-4163	60	FEMALE	T3	N0	M0
TCGA-BP-4330	60	FEMALE	T3	N0	M0
TCGA-B8-5163	63	FEMALE	T3	N0	M0
TCGA-B0-5113	69	FEMALE	T3	N0	M0
TCGA-B8-4620	70	FEMALE	T3	N0	M0
TCGA-B0-4693	72	FEMALE	T3	N0	M0
TCGA-B0-4842	73	FEMALE	T3	N0	M0
TCGA-B0-4710	75	FEMALE	T3	N0	M0
TCGA-B0-5085	76	FEMALE	T3	N0	M0
TCGA-B0-5075	77	FEMALE	T3	N0	M0
TCGA-CJ-4873	85	FEMALE	T3	N0	M0
TCGA-CZ-5467	86	FEMALE	T3	N0	M0
TCGA-BP-4332	36	MALE	T3	N0	M0
TCGA-BP-4971	40	MALE	T3	N0	M0
TCGA-B0-4811	48	MALE	T3	N0	M0
TCGA-CJ-4640	49	MALE	T3	N0	M0
TCGA-CJ-4636	51	MALE	T3	N0	M0
TCGA-B0-5108	54	MALE	T3	N0	M0
TCGA-BP-4334	56	MALE	T3	N0	M0
TCGA-B0-4843	57	MALE	T3	N0	M0
TCGA-BP-4989	58	MALE	T3	N0	M0
TCGA-B0-4696	58	MALE	T3	N0	M0
TCGA-CJ-4894	58	MALE	T3	N0	M0
TCGA-BP-5010	63	MALE	T3	N0	M0
TCGA-BP-4343	64	MALE	T3	N0	M0
TCGA-B8-5164	65	MALE	T3	N0	M0
TCGA-BP-4160	67	MALE	T3	N0	M0
TCGA-BP-4166	69	MALE	T3	N0	M0
TCGA-B0-5696	69	MALE	T3	N0	M0
TCGA-B8-5550	71	MALE	T3	N0	M0
TCGA-B0-5694	71	MALE	T3	N0	M0
TCGA-BP-4985	72	MALE	T3	N0	M0
TCGA-A3-3352	74	MALE	T3	N0	M0
TCGA-BP-4329	75	MALE	T3	N0	M0
TCGA-BP-4967	76	MALE	T3	N0	M0
TCGA-BP-5191	79	MALE	T3	N0	M0
TCGA-B0-5095	81	MALE	T3	N0	M0
TCGA-CZ-4863	51	FEMALE	T3	N0	M0
TCGA-B0-5400	59	FEMALE	T3	N0	M0
TCGA-B0-5097	59	FEMALE	T3	N0	M0
TCGA-CW-5587	62	FEMALE	T3	N0	M0
TCGA-B0-5692	66	FEMALE	T3	N0	M0
TCGA-B0-4821	68	FEMALE	T3	N0	M0
TCGA-B0-5713	75	FEMALE	T3	N0	M0
TCGA-BP-4337	76	FEMALE	T3	N0	M0
TCGA-A3-3308	77	FEMALE	T3	N0	M0
TCGA-B0-4827	77	FEMALE	T3	N0	M0
TCGA-B0-5081	79	FEMALE	T3	N0	M0
TCGA-BP-4797	34	MALE	T3	N0	M0
TCGA-B0-5116	52	MALE	T3	N0	M0
TCGA-BP-4346	57	MALE	T3	N0	M0
TCGA-BP-4345	62	MALE	T3	N0	M0
TCGA-AK-3428	62	MALE	T3	N0	M0
TCGA-B0-5701	65	MALE	T3	N0	M0
TCGA-B4-5832	65	MALE	T3	N0	M0
TCGA-A3-3307	66	MALE	T3	N0	M0
TCGA-BP-4799	70	MALE	T3	N0	M0
TCGA-BP-5198	72	MALE	T3	N0	M0
TCGA-CJ-4891	57	FEMALE	T3	N0	M0
TCGA-B0-4817	81	MALE	T3	N0	M0
TCGA-BP-4770	73	FEMALE	T4	N0	M0
TCGA-B0-5092	53	FEMALE	T1	N0	M1
TCGA-G6-A5PC	54	FEMALE	T1	N0	M1
TCGA-B0-5107	65	FEMALE	T2	N0	M1
TCGA-B0-5712	68	FEMALE	T2	N0	M1
TCGA-AK-3436	40	MALE	T2	N0	M1
TCGA-B0-5115	43	MALE	T2	N0	M1
TCGA-B0-4691	55	MALE	T2	N0	M1
TCGA-CZ-5454	63	MALE	T2	N0	M1
TCGA-CJ-5678	62	MALE	T2	N0	M1
TCGA-B4-5377	68	FEMALE	T3	N0	M1
TCGA-CJ-4644	48	FEMALE	T3	N0	M1
TCGA-CJ-6033	54	FEMALE	T3	N0	M1
TCGA-BP-4787	59	FEMALE	T3	N0	M1
TCGA-CJ-4904	60	FEMALE	T3	N0	M1
TCGA-BP-4335	65	FEMALE	T3	N0	M1
TCGA-B0-4701	66	FEMALE	T3	N0	M1
TCGA-B8-4143	66	FEMALE	T3	N0	M1
TCGA-CJ-4868	42	MALE	T3	N0	M1
TCGA-B0-4703	51	MALE	T3	N0	M1
TCGA-B0-4846	52	MALE	T3	N0	M1
TCGA-CZ-4857	56	MALE	T3	N0	M1
TCGA-CW-5591	56	MALE	T3	N0	M1
TCGA-B8-4622	57	MALE	T3	N0	M1
TCGA-BP-4974	58	MALE	T3	N0	M1
TCGA-BP-4771	62	MALE	T3	N0	M1
TCGA-B0-5080	63	MALE	T3	N0	M1
TCGA-CJ-4918	64	MALE	T3	N0	M1
TCGA-CJ-4890	72	MALE	T3	N0	M1
TCGA-BP-4352	74	FEMALE	T3	N0	M1
TCGA-CW-5585	51	MALE	T3	N0	M1
TCGA-B0-5094	62	MALE	T3	N0	M1
TCGA-BP-5201	63	MALE	T3	N0	M1
TCGA-BP-4798	74	MALE	T3	N0	M1
TCGA-B0-4688	46	MALE	T4	N0	M1
TCGA-B0-4814	58	MALE	T4	N0	M1
TCGA-B0-4690	65	MALE	T4	N0	M1
TCGA-B0-4699	74	MALE	T4	N0	M1
TCGA-G6-A8L7	81	FEMALE	T1	N0	unknown
TCGA-B8-A54H	69	FEMALE	T2	N0	unknown
TCGA-DV-A4VX	59	MALE	T3	N0	unknown
TCGA-BP-4970	44	MALE	T1	N1	M0
TCGA-A3-3347	76	FEMALE	T1	N1	M0
TCGA-CJ-4869	49	MALE	T2	N1	M0
TCGA-B4-5838	52	MALE	T3	N1	M0
TCGA-B0-5096	72	FEMALE	T3	N1	M0
TCGA-AK-3426	37	MALE	T3	N1	M0
TCGA-B0-4810	47	MALE	T3	N1	M0
TCGA-B8-5158	56	MALE	T3	N1	M0
TCGA-BP-4761	57	MALE	T3	N1	M0
TCGA-AK-3430	61	MALE	T3	N1	M0
TCGA-B0-5109	69	MALE	T3	N1	M0
TCGA-CW-5584	74	MALE	T3	N1	M0
TCGA-CJ-4638	46	FEMALE	T3	N1	M1
TCGA-B0-5084	33	MALE	T3	N1	M1
TCGA-CW-6087	61	MALE	T3	N1	M1
TCGA-CJ-4900	69	FEMALE	T4	N1	M1
TCGA-BP-4354	40	MALE	T4	N1	M1
TCGA-EU-5904	47	FEMALE	T1	unknown	M0
TCGA-B0-5098	53	FEMALE	T1	unknown	M0
TCGA-EU-5905	67	FEMALE	T1	unknown	M0
TCGA-B0-5102	74	FEMALE	T1	unknown	M0
TCGA-A3-3336	75	FEMALE	T1	unknown	M0
TCGA-CZ-4866	79	FEMALE	T1	unknown	M0
TCGA-A3-3383	52	MALE	T1	unknown	M0
TCGA-A3-3311	57	MALE	T1	unknown	M0
TCGA-DV-5569	29	FEMALE	T1	unknown	M0
TCGA-DV-5567	40	FEMALE	T1	unknown	M0
TCGA-CJ-4886	42	FEMALE	T1	unknown	M0
TCGA-BP-4766	43	FEMALE	T1	unknown	M0
TCGA-CW-6096	44	FEMALE	T1	unknown	M0
TCGA-BP-5174	45	FEMALE	T1	unknown	M0
TCGA-BP-5177	46	FEMALE	T1	unknown	M0
TCGA-CW-5583	51	FEMALE	T1	unknown	M0
TCGA-DV-5575	52	FEMALE	T1	unknown	M0
TCGA-BP-4775	55	FEMALE	T1	unknown	M0
TCGA-DV-5576	55	FEMALE	T1	unknown	M0
TCGA-BP-4782	55	FEMALE	T1	unknown	M0
TCGA-BP-4774	57	FEMALE	T1	unknown	M0
TCGA-CZ-5982	59	FEMALE	T1	unknown	M0
TCGA-CJ-4905	62	FEMALE	T1	unknown	M0
TCGA-CJ-4889	63	FEMALE	T1	unknown	M0
TCGA-BP-4969	63	FEMALE	T1	unknown	M0
TCGA-BP-4784	67	FEMALE	T1	unknown	M0
TCGA-DV-5566	67	FEMALE	T1	unknown	M0
TCGA-BP-4349	68	FEMALE	T1	unknown	M0
TCGA-CZ-4865	70	FEMALE	T1	unknown	M0
TCGA-BP-4344	75	FEMALE	T1	unknown	M0
TCGA-CW-5588	78	FEMALE	T1	unknown	M0
TCGA-BP-5176	78	FEMALE	T1	unknown	M0
TCGA-BP-4763	79	FEMALE	T1	unknown	M0
TCGA-DV-5568	26	MALE	T1	unknown	M0
TCGA-AS-3778	35	MALE	T1	unknown	M0
TCGA-DV-5574	37	MALE	T1	unknown	M0
TCGA-CJ-4908	38	MALE	T1	unknown	M0
TCGA-BP-5194	39	MALE	T1	unknown	M0
TCGA-BP-4758	40	MALE	T1	unknown	M0
TCGA-DV-5573	41	MALE	T1	unknown	M0
TCGA-BP-4762	42	MALE	T1	unknown	M0
TCGA-BP-4807	42	MALE	T1	unknown	M0
TCGA-BP-4765	43	MALE	T1	unknown	M0
TCGA-BP-4965	46	MALE	T1	unknown	M0
TCGA-BP-4777	46	MALE	T1	unknown	M0
TCGA-A3-3365	46	MALE	T1	unknown	M0
TCGA-BP-5008	46	MALE	T1	unknown	M0
TCGA-A3-3326	47	MALE	T1	unknown	M0
TCGA-BP-4961	47	MALE	T1	unknown	M0
TCGA-BP-4789	48	MALE	T1	unknown	M0
TCGA-BP-4998	49	MALE	T1	unknown	M0
TCGA-BP-4759	50	MALE	T1	unknown	M0
TCGA-A3-3322	51	MALE	T1	unknown	M0
TCGA-CJ-5671	51	MALE	T1	unknown	M0
TCGA-CW-5589	52	MALE	T1	unknown	M0
TCGA-BP-4776	52	MALE	T1	unknown	M0
TCGA-A3-3325	52	MALE	T1	unknown	M0
TCGA-BP-5196	53	MALE	T1	unknown	M0
TCGA-BP-5180	53	MALE	T1	unknown	M0
TCGA-BP-5004	53	MALE	T1	unknown	M0
TCGA-BP-5184	54	MALE	T1	unknown	M0
TCGA-BP-5187	54	MALE	T1	unknown	M0
TCGA-BP-4991	54	MALE	T1	unknown	M0
TCGA-BP-4994	54	MALE	T1	unknown	M0
TCGA-BP-5170	55	MALE	T1	unknown	M0
TCGA-BP-5185	56	MALE	T1	unknown	M0
TCGA-BP-4999	56	MALE	T1	unknown	M0
TCGA-BP-4801	57	MALE	T1	unknown	M0
TCGA-AK-3440	58	MALE	T1	unknown	M0
TCGA-BP-4993	58	MALE	T1	unknown	M0
TCGA-AK-3460	58	MALE	T1	unknown	M0
TCGA-BP-5192	59	MALE	T1	unknown	M0
TCGA-DV-5565	59	MALE	T1	unknown	M0
TCGA-BP-5175	60	MALE	T1	unknown	M0
TCGA-BP-5190	61	MALE	T1	unknown	M0
TCGA-AS-3777	63	MALE	T1	unknown	M0
TCGA-BP-4769	63	MALE	T1	unknown	M0
TCGA-BP-4177	65	MALE	T1	unknown	M0
TCGA-BP-4760	69	MALE	T1	unknown	M0
TCGA-AK-3461	72	MALE	T1	unknown	M0
TCGA-CW-6093	73	MALE	T1	unknown	M0
TCGA-B2-5635	74	MALE	T1	unknown	M0
TCGA-BP-5168	75	MALE	T1	unknown	M0
TCGA-BP-5195	75	MALE	T1	unknown	M0
TCGA-BP-5173	75	MALE	T1	unknown	M0
TCGA-BP-4790	76	MALE	T1	unknown	M0
TCGA-BP-4976	77	MALE	T1	unknown	M0
TCGA-CJ-6027	77	MALE	T1	unknown	M0
TCGA-BP-4781	78	MALE	T1	unknown	M0
TCGA-B2-5636	79	MALE	T1	unknown	M0
TCGA-CZ-4853	82	MALE	T1	unknown	M0
TCGA-B2-4099	83	MALE	T1	unknown	M0
TCGA-CJ-5672	84	MALE	T1	unknown	M0
TCGA-BP-4987	41	FEMALE	T1	unknown	M0
TCGA-B8-5552	41	FEMALE	T1	unknown	M0
TCGA-B8-4146	41	FEMALE	T1	unknown	M0
TCGA-BP-5001	43	FEMALE	T1	unknown	M0
TCGA-B0-5693	47	FEMALE	T1	unknown	M0
TCGA-A3-3320	52	FEMALE	T1	unknown	M0
TCGA-B0-5690	53	FEMALE	T1	unknown	M0
TCGA-BP-5181	58	FEMALE	T1	unknown	M0
TCGA-CJ-5686	59	FEMALE	T1	unknown	M0
TCGA-CJ-4634	60	FEMALE	T1	unknown	M0
TCGA-CJ-4920	64	FEMALE	T1	unknown	M0
TCGA-AK-3465	71	FEMALE	T1	unknown	M0
TCGA-B2-4098	72	FEMALE	T1	unknown	M0
TCGA-CJ-4893	76	FEMALE	T1	unknown	M0
TCGA-AK-3444	80	FEMALE	T1	unknown	M0
TCGA-B0-5117	40	MALE	T1	unknown	M0
TCGA-BP-5000	40	MALE	T1	unknown	M0
TCGA-BP-4975	40	MALE	T1	unknown	M0
TCGA-BP-4982	42	MALE	T1	unknown	M0
TCGA-CJ-4899	42	MALE	T1	unknown	M0
TCGA-CW-5581	44	MALE	T1	unknown	M0
TCGA-CZ-4862	46	MALE	T1	unknown	M0
TCGA-AK-3458	48	MALE	T1	unknown	M0
TCGA-CJ-4635	48	MALE	T1	unknown	M0
TCGA-BP-4959	49	MALE	T1	unknown	M0
TCGA-CJ-4903	50	MALE	T1	unknown	M0
TCGA-A3-3324	51	MALE	T1	unknown	M0
TCGA-BP-5009	52	MALE	T1	unknown	M0
TCGA-A3-3323	53	MALE	T1	unknown	M0
TCGA-B0-5812	53	MALE	T1	unknown	M0
TCGA-CJ-6031	54	MALE	T1	unknown	M0
TCGA-EU-5906	55	MALE	T1	unknown	M0
TCGA-BP-4977	57	MALE	T1	unknown	M0
TCGA-BP-4804	59	MALE	T1	unknown	M0
TCGA-BP-5189	60	MALE	T1	unknown	M0
TCGA-B2-4102	61	MALE	T1	unknown	M0
TCGA-BP-4963	63	MALE	T1	unknown	M0
TCGA-BP-4176	64	MALE	T1	unknown	M0
TCGA-BP-4992	66	MALE	T1	unknown	M0
TCGA-CW-6090	68	MALE	T1	unknown	M0
TCGA-A3-3346	68	MALE	T1	unknown	M0
TCGA-A3-3382	69	MALE	T1	unknown	M0
TCGA-A3-3319	70	MALE	T1	unknown	M0
TCGA-AK-3434	72	MALE	T1	unknown	M0
TCGA-B2-3924	73	MALE	T1	unknown	M0
TCGA-BP-4161	74	MALE	T1	unknown	M0
TCGA-CJ-5683	78	MALE	T1	unknown	M0
TCGA-AK-3454	84	MALE	T1	unknown	M0
TCGA-CJ-5689	90	MALE	T1	unknown	M0
TCGA-AK-3453	58	FEMALE	T2	unknown	M0
TCGA-AK-3431	62	FEMALE	T2	unknown	M0
TCGA-CJ-6032	63	FEMALE	T2	unknown	M0
TCGA-B0-4818	68	FEMALE	T2	unknown	M0
TCGA-CZ-4858	39	MALE	T2	unknown	M0
TCGA-BP-5200	44	MALE	T2	unknown	M0
TCGA-CJ-4642	47	MALE	T2	unknown	M0
TCGA-A3-3316	57	MALE	T2	unknown	M0
TCGA-BP-4962	58	MALE	T2	unknown	M0
TCGA-B2-3923	59	MALE	T2	unknown	M0
TCGA-CJ-4912	61	MALE	T2	unknown	M0
TCGA-CZ-4861	63	MALE	T2	unknown	M0
TCGA-CZ-5453	67	MALE	T2	unknown	M0
TCGA-CZ-5463	76	MALE	T2	unknown	M0
TCGA-B0-4822	78	MALE	T2	unknown	M0
TCGA-AK-3447	83	MALE	T2	unknown	M0
TCGA-B2-4101	52	MALE	T2	unknown	M0
TCGA-B2-A4SR	61	MALE	T2	unknown	M0
TCGA-B8-5162	62	MALE	T2	unknown	M0
TCGA-CJ-5675	70	MALE	T2	unknown	M0
TCGA-A3-3372	64	MALE	T3	unknown	M0
TCGA-BP-4972	43	FEMALE	T3	unknown	M0
TCGA-CJ-4913	45	FEMALE	T3	unknown	M0
TCGA-BP-4164	51	FEMALE	T3	unknown	M0
TCGA-CJ-4870	58	FEMALE	T3	unknown	M0
TCGA-BP-4355	59	FEMALE	T3	unknown	M0
TCGA-B0-5709	62	FEMALE	T3	unknown	M0
TCGA-BP-4983	67	FEMALE	T3	unknown	M0
TCGA-CJ-4916	69	FEMALE	T3	unknown	M0
TCGA-CJ-4878	71	FEMALE	T3	unknown	M0
TCGA-CJ-4884	72	FEMALE	T3	unknown	M0
TCGA-BP-4981	75	FEMALE	T3	unknown	M0
TCGA-CJ-4897	79	FEMALE	T3	unknown	M0
TCGA-CW-6097	32	MALE	T3	unknown	M0
TCGA-CJ-4881	41	MALE	T3	unknown	M0
TCGA-CZ-5458	43	MALE	T3	unknown	M0
TCGA-BP-4973	47	MALE	T3	unknown	M0
TCGA-B0-4849	51	MALE	T3	unknown	M0
TCGA-B0-4718	57	MALE	T3	unknown	M0
TCGA-CJ-4882	57	MALE	T3	unknown	M0
TCGA-BP-5183	57	MALE	T3	unknown	M0
TCGA-BP-4167	59	MALE	T3	unknown	M0
TCGA-CJ-5684	61	MALE	T3	unknown	M0
TCGA-CJ-4902	61	MALE	T3	unknown	M0
TCGA-B0-4706	61	MALE	T3	unknown	M0
TCGA-CZ-5457	62	MALE	T3	unknown	M0
TCGA-B0-4707	63	MALE	T3	unknown	M0
TCGA-B0-4815	65	MALE	T3	unknown	M0
TCGA-CZ-5466	67	MALE	T3	unknown	M0
TCGA-BP-4341	67	MALE	T3	unknown	M0
TCGA-AK-3445	69	MALE	T3	unknown	M0
TCGA-B0-5100	72	MALE	T3	unknown	M0
TCGA-B8-4153	74	MALE	T3	unknown	M0
TCGA-BP-5202	75	MALE	T3	unknown	M0
TCGA-BP-4803	79	MALE	T3	unknown	M0
TCGA-EU-5907	81	MALE	T3	unknown	M0
TCGA-AK-3455	71	FEMALE	T3	unknown	M0
TCGA-B0-4713	76	FEMALE	T3	unknown	M0
TCGA-CZ-5465	76	FEMALE	T3	unknown	M0
TCGA-B0-5099	88	FEMALE	T3	unknown	M0
TCGA-CJ-4901	47	MALE	T3	unknown	M0
TCGA-CJ-5676	47	MALE	T3	unknown	M0
TCGA-B0-5711	50	MALE	T3	unknown	M0
TCGA-B0-4848	54	MALE	T3	unknown	M0
TCGA-CJ-4907	58	MALE	T3	unknown	M0
TCGA-CZ-5459	63	MALE	T3	unknown	M0
TCGA-B0-4813	68	MALE	T3	unknown	M0
TCGA-B0-4694	72	MALE	T3	unknown	M0
TCGA-CJ-5679	73	MALE	T3	unknown	M0
TCGA-BP-4347	74	MALE	T3	unknown	M0
TCGA-B0-5402	64	MALE	T4	unknown	M0
TCGA-B0-4698	75	MALE	T4	unknown	M0
TCGA-CZ-5461	52	MALE	T1	unknown	M1
TCGA-CZ-5462	83	MALE	T1	unknown	M1
TCGA-B0-4841	63	MALE	T2	unknown	M1
TCGA-B0-4828	79	MALE	T2	unknown	M1
TCGA-CJ-4637	52	FEMALE	T2	unknown	M1
TCGA-B2-5639	46	MALE	T3	unknown	M1
TCGA-CJ-5681	44	FEMALE	T3	unknown	M1
TCGA-CJ-5677	54	FEMALE	T3	unknown	M1
TCGA-CJ-4641	55	FEMALE	T3	unknown	M1
TCGA-CJ-4923	63	FEMALE	T3	unknown	M1
TCGA-CJ-5680	65	FEMALE	T3	unknown	M1
TCGA-CW-5580	73	FEMALE	T3	unknown	M1
TCGA-CJ-4887	48	MALE	T3	unknown	M1
TCGA-CW-5590	51	MALE	T3	unknown	M1
TCGA-CJ-6028	58	MALE	T3	unknown	M1
TCGA-CJ-4888	59	MALE	T3	unknown	M1
TCGA-CJ-5682	60	MALE	T3	unknown	M1
TCGA-B0-4844	60	MALE	T3	unknown	M1
TCGA-B0-4847	60	MALE	T3	unknown	M1
TCGA-CJ-4895	62	MALE	T3	unknown	M1
TCGA-CJ-4871	63	MALE	T3	unknown	M1
TCGA-CJ-4885	64	MALE	T3	unknown	M1
TCGA-CJ-4875	67	MALE	T3	unknown	M1
TCGA-B0-4845	70	MALE	T3	unknown	M1
TCGA-BP-5178	71	MALE	T3	unknown	M1
TCGA-B0-4712	76	MALE	T3	unknown	M1
TCGA-B0-4697	46	FEMALE	T3	unknown	M1
TCGA-B0-4819	60	FEMALE	T3	unknown	M1
TCGA-CZ-5460	55	MALE	T3	unknown	M1
TCGA-CZ-5987	60	MALE	T3	unknown	M1
TCGA-B0-4836	61	MALE	T3	unknown	M1
TCGA-CZ-5455	63	MALE	T3	unknown	M1
TCGA-CZ-5464	69	MALE	T3	unknown	M1
TCGA-B0-4714	81	MALE	T3	unknown	M1
TCGA-CZ-5468	84	MALE	T3	unknown	M1
TCGA-CZ-4860	60	MALE	T4	unknown	M1
TCGA-B0-4700	60	MALE	T4	unknown	M1
TCGA-T7-A92I	47	FEMALE	T1	unknown	unknown
TCGA-B8-A54F	49	FEMALE	T1	unknown	unknown
TCGA-A3-A6NJ	57	FEMALE	T1	unknown	unknown
TCGA-MM-A84U	58	FEMALE	T1	unknown	unknown
TCGA-A3-A8CQ	59	FEMALE	T1	unknown	unknown
TCGA-A3-A8OX	65	FEMALE	T1	unknown	unknown
TCGA-MW-A4EC	72	FEMALE	T1	unknown	unknown
TCGA-A3-A8OU	74	FEMALE	T1	unknown	unknown
TCGA-GK-A6C7	76	FEMALE	T1	unknown	unknown
TCGA-A3-A6NI	47	MALE	T1	unknown	unknown
TCGA-B8-A54G	50	MALE	T1	unknown	unknown
TCGA-DV-A4VZ	53	MALE	T1	unknown	unknown
TCGA-B8-A54K	61	MALE	T1	unknown	unknown
TCGA-A3-A8OV	75	MALE	T1	unknown	unknown
TCGA-A3-A6NN	78	MALE	T1	unknown	unknown
TCGA-A3-A6NL	49	FEMALE	T1	unknown	unknown
TCGA-B8-A54E	62	FEMALE	T1	unknown	unknown
TCGA-G6-A8L8	62	FEMALE	T1	unknown	unknown
TCGA-6D-AA2E	68	FEMALE	T1	unknown	unknown
TCGA-B8-A54I	48	MALE	T1	unknown	unknown
TCGA-DV-A4W0	55	MALE	T1	unknown	unknown
TCGA-G6-A8L6	55	MALE	T2	unknown	unknown
TCGA-B8-A54J	60	MALE	T2	unknown	unknown
TCGA-MM-A564	68	MALE	T2	unknown	unknown
TCGA-MM-A563	41	MALE	T3	unknown	unknown
TCGA-A3-A8OW	37	MALE	T3	unknown	unknown
TCGA-B8-A54D	69	MALE	T3	unknown	unknown
TCGA-B8-A7U6	54	FEMALE	T1	unknown	unknown
TCGA-B8-A8YJ	60	FEMALE	T1	unknown	unknown
GSM733583	54	unknown	T1	N0	M0
GSM733587	74	unknown	T1	N0	M0
GSM733588	68	unknown	T1	N0	M0
GSM733590	55	unknown	T1	N0	M0
GSM733591	72	unknown	T1	N0	M0
GSM733592	53	unknown	T1	N0	M0
GSM733593	40	unknown	T1	N0	M0
GSM733606	51	unknown	T1	N0	M0
GSM733616	65	unknown	T1	N0	M0
GSM733608	56	unknown	T2	N0	M0
GSM733609	77	unknown	T2	N0	M0
GSM733615	55	unknown	T2	N0	M0
GSM733580	52	unknown	T3	N0	M0
GSM733585	49	unknown	T3	N0	M0
GSM733596	70	unknown	T3	N0	M0
GSM733597	68	unknown	T3	N0	M0
GSM733598	55	unknown	T3	N0	M0
GSM733611	61	unknown	T3	N0	M0
GSM733613	78	unknown	T3	N0	M0
GSM733605	77	unknown	T2	N1	M0
GSM733582	64	unknown	T3	N1	M0
GSM733600	43	unknown	T3	N1	M0
GSM733610	44	unknown	T3	N2	M0
GSM733617	78	unknown	T3	N2	M0
GSM733581	67	unknown	T1	N0	M0
GSM733586	61	unknown	T1	N0	M1
GSM733602	73	unknown	T2	N0	M1
GSM733589	69	unknown	T3	N0	M1
GSM733594	60	unknown	T3	N0	M1
GSM733595	68	unknown	T3	N0	M1
GSM733599	64	unknown	T3	N0	M1
GSM733601	72	unknown	T3	N0	M1
GSM733603	50	unknown	T3	N0	M1
GSM733604	72	unknown	T3	N0	M1
GSM733614	65	unknown	T3	N0	M1
GSM733579	43	unknown	T4	N0	M1
GSM733607	75	unknown	T3	N1	M1
GSM733612	75	unknown	T3	N1	M1
GSM733584	21	unknown	T3	N2	M1
